# Supplementary material for: Proinflammatory cytokines and lipopolysaccharides up regulate MMP-3 and MMP-13 production in Asian elephant (Elephas maximus) chondrocytes: attenuation by anti-arthritic agents
Source: PubMed Central journal article supplement (PMC6873576; doi:10.1186/s12917-019-2170-8), 2019-11-21
Supplement: 12917_2019_2170_MOESM1_ESM.pdf [file 12917_2019_2170_MOESM1_ESM.pdf]

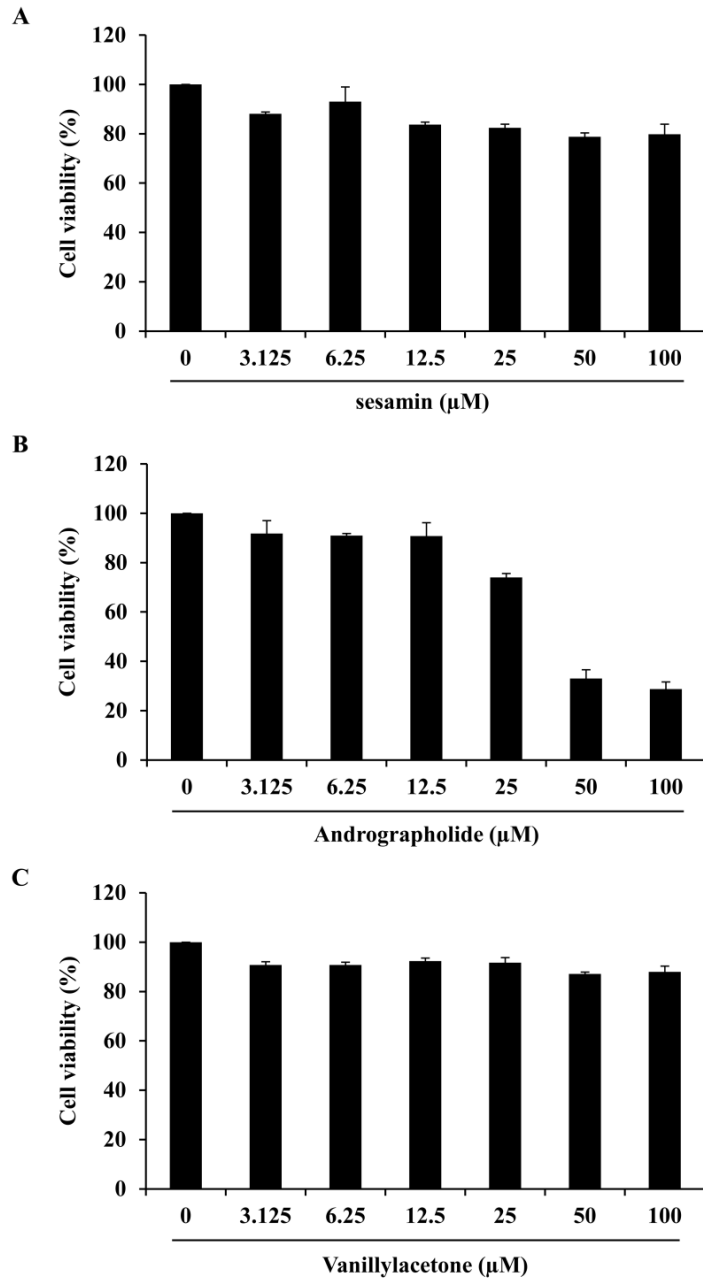

**The effect of natural compounds on elephant articular chondrocytes viability.**

The elephant articular chondrocytes were incubated for 24 hours with sesamin (0-100  $\mu\text{M}$ ) (A), andrographolide (0-100  $\mu\text{M}$ ) (B), and vanillylacetone (0-100  $\mu\text{M}$ ) (C). The viability of the cells was determined using the MTT assay. The cell viability was expressed as a percentage relative to that of 0  $\mu\text{M}$ . The bar graphs were expressed as the mean  $\pm$  SEM of three independent experiments.
